# Supplementary material for: Overexpression of HOXA9 upregulates NF-κB signaling to promote human hematopoiesis and alter the hematopoietic differentiation potentials
Source: PubMed Central journal article supplement (PMC7797385; doi:10.1186/s13619-020-00066-0), 2021-01-11

## **Supplemental Information**

### **Supplemental materials and methods**

#### **Cell cycle analysis**

At D14 non-induced *HOXA9*/hESC co-cultures or D4-induced *HOXA9*/hESC co-cultures with or without 10 nM QNZ or 20 nM siRNA against *NFKB1* were treated with 10  $\mu$ M BrdU for 12 h, dissociated by treatment with 0.25% trypsin solution, stained with anti-CD45 antibody, and then subjected to analysis of cell cycle status using the APC-BrdU Flow Kit (BD Biosciences), which was visualized by flow cytometry analysis.

#### **May-Grunwald-Giemsa staining**

Cells from BFU-E colonies were harvested and spun onto glass slides using the Cell Cytospin 4 (Thermo Fisher Scientific), dyed in May-Grunwald solution (MERCK No. 101424) for 10 min, and further stained in Giemsa B solution for 2–3 min. After washing, Giemsa A solution (MERCK No. 10924) and Giemsa B solution were added at a 1:20 ratio for 20 min, and the sample was washed with water and air dried. Samples were imaged under an oil emersion lens on an Olympus BX53 microscope.

### **Quantitative reverse transcription PCR (qRT-PCR)**

Total RNA was extracted from  $5 \times 10^5$  cells using 500  $\mu$ l TRIzol (Life Technologies). Complementary DNA was synthesized using a reverse transcription kit (Bio-Rad). Each 20  $\mu$ l reaction contained 4  $\mu$ l of 5 $\times$  Mixture, 1  $\mu$ l reverse transcriptase, 1  $\mu$ g of total RNA, and nuclease-free water to 20  $\mu$ l. The program used for reverse transcription was as follows: 25°C for 5 min, 42°C for 30 min, 85°C for 5 min, and hold at 4°C. qPCR was performed using the Fast Start Universal SYBR Green Master (Roche) on a CFX96™ real-time system (Bio-Rad). Each 15  $\mu$ l reaction contained 7.5  $\mu$ l of 2 $\times$  Mixture, 0.4  $\mu$ l of each primer (10  $\mu$ M), 4.7  $\mu$ l H<sub>2</sub>O, and 2  $\mu$ l complementary DNA (cDNA). The conditions were as follows: denaturation for 10 min at 95°C, followed by 45 cycles of 95°C for 15 sec, 58°C for 30 sec, and 72°C for 30 sec. Glyceraldehyde 3-phosphate dehydrogenase (*GAPDH*) served as an internal control. The primers for qRT-PCR were listed in Table S1. Among them the primer pairs of HOXA9-1 and GAPDH-1 were specially designed for human *HOXA9* and *GAPDH* transcripts, and cannot be used to detect the transcripts of corresponding mouse genes. They were used to perform the qRT-PCR detection of endogenous human *HOXA9* of un-modified H1 hESC co-cultures during hematopoiesis so as to exclude the interference of AGM-S3 cells, which results are presented in Figure S4. For primer pair of HOXA9-1 was designed in un-translated region (UTR) of human *HOXA9* transcripts it couldn't detect the transcript of exogenously expressed

*HOXA9*. The primer pairs of *HOXA9-2* and *GAPDH-2* designed according to the coding region sequences of human *HOXA9* and *GAPDH* transcripts and mouse *Hoxa9* and *Gapdh* transcripts were used to perform the qRT-PCR detection of exogenously expressed human *HOXA9* of induced or non-induced *HOXA9*/hESCs cultured in hESC medium (mTeSR1, Stem cell, USA), which results were not interfered by the AGM-S3 cells, and presented in Figure 1C.

### **West blot analysis**

Cells were lysed in RIPA buffer (Sigma) with shaking on ice for 30 min. After centrifugation (12,000 x g, 4°C, 5 min), the protein concentration in the extract was assayed using the classical BCA method. Proteins were denatured at 100°C for 5 min and then electrophoresed by denaturing SDS-PAGE (5% separation gel/10% stacking gel) according to the standard protocol of the Bio-Rad Mini-PROTEAN Tetra Cell electrophoresis system. Proteins were transferred to a PVDF membrane using a Bio-Rad Trans-Blot cell in 1× TBST (10 mM Tris-HCl, pH 8.0, 150 mM NaCl, and 0.05% Tween 20). Thereafter, membranes were incubated with anti-SOX2 (diluted 1:1000; Cat. # sc-365823, SANTA CRUZ), anti-OCT3/4 (diluted 1:1000; Cat. # sc-5279, SANTA CRUZ), anti-NANOG (diluted 1:1000; Cat. # sc-293121, SANTA CRUZ), anti-HOXA9 (diluted 1:1000; Cat. # ab140631, Abcam), or anti-GAPDH (diluted 1:1000; Cat. # KC-5G4, KANG CHEN) mouse monoclonal IgGs in blocking solution (1× TBST containing 5% non-fat milk powder) overnight at 4°C. Membranes were then washed with 1× TBST, incubated with horseradish peroxidase-conjugated goat anti-mouse IgG H&L (diluted 1:1000; Cat. # ZB-2305,

ZSBIO) or Donkey Anti-rabbit IgG (diluted 1:1000; Cat. # bs-0295D, Bioss) in blocking solution, washed again with 1× TBST, and finally developed using an Amersham ECL Prime western blotting detection kit (Cat. # RPN2232, GE Healthcare). Signals were quantified using an ImageQuant LAS4000 mini system. Molecular weights were calculated by reference to the pre-stained protein ladder (Cat. # 26626, PageRuler).

## Supplemental Figure Legends

**Supplemental Figure 1.** After determination of the best mode of *HOXA9* induction (induction from D4 or later), the following cultures were initiated: KDR<sup>+</sup> cells sorted at D1 or D4 from non-induced *HOXA9*/hESC co-cultures were re-plated on AGM-S3 with or without DOX induction for 10 or 12 days; CD34<sup>+</sup>CD43<sup>+</sup> cells sorted from non-induced co-cultures at D8 were re-plated on AGM-S3 with or without DOX induction for 10 days; CD34<sup>+</sup>CD43<sup>+</sup> cells sorted from non-induced co-cultures at D14 were cultured in myeloid or erythroid expansion medium with or without DOX induction for 8 days. The results are shown in Figures 3–5.

**Supplemental Figure 2.** Co-cultured *HOXA9*/hESCs were treated with DOX from D0, D2, D4, D6, D8, D10, or D12, and analyzed by flow cytometry using 7-AAD and the combination of the antibodies against (A) KDR (at D4), (B) CD34/CD43 (at D8), or (C) CD34/CD43, CD34/CD45, and GPA/CD71 (at D14). Non-induced co-cultures and the GFP<sup>+</sup> fraction

of co-cultures treated with DOX were compared using flow cytometry analysis. Overexpression of *HOXA9* from D4 caused the greatest stimulation of hematopoiesis and myelogenesis, but impaired the erythropoiesis.

**Supplemental Figure 3.** The D14 *HOXA9*/hESCs co-cultures treated with or without DOX or treated with both DOX and 10 nM QNZ/ 20 nM siRNA against NFKB1 from D4 were subjected to flow cytometry analysis at D14.

**Supplemental Figure 4.** Un-modified H1 hESCs co-cultured with AGM-S3 were collected at D2, D4, D6, D8, D10, D12, or D14, and *HOXA9* mRNA expression was detected by qRT-PCR analysis using primer pairs of HOXA9-1 and GAPDH-1. *GAPDH* was used as an internal control.

**TABLE S1**  
**Primers used for qRT-PCR analysis**

| Gene           | Forward primer (5'→3')      | Reverse primer (5'→3')  |
|----------------|-----------------------------|-------------------------|
| <i>NF-KB1</i>  | GAAGAGGAAGAAAATGGTGGAGT     | AAACACAGAGGCTGGTTTTGTAA |
| <i>NF-KB2</i>  | GAGAGAAGCCGCAACCAGAG        | GGGTTGTAGCAACTCTCCATGTC |
| <i>HOXA9-1</i> | CGAGTGATGCCATTTGGGCTTATTTAG | AGGGTGGGGGTGAGAGAAGG    |
| <i>HOXA9-2</i> | GCGCCTTCTCTGAAAACAAT        | CAGTTCCAGGGTCTGGTGTT    |
| <i>GAPDH-1</i> | CGACAGTCAGCCGCATCTTCTT      | TTCCCCATGGTGTCTGAGCG    |
| <i>GAPDH-2</i> | GTCTCCTCTGACTTCAACAGCG      | ACCACCCTGTTGCTGTAGCCAA  |

**TABLE S2****Flow cytometry antibodies**

| Antibodies  | Brand | Antibody channels | Cat    |
|-------------|-------|-------------------|--------|
| CD309(KDR)  | BD    | PE                | 560494 |
| CD34        | BD    | APC               | 555824 |
| CD43        | BD    | PE                | 560199 |
| CD45        | BD    | PE-CY7            | 557748 |
| CD235a(GPA) | BD    | APC               | 551336 |
| CD71        | BD    | PE                | 561938 |
| 7-AAD       | BD    | 7-AAD             | 559925 |

Figure S1

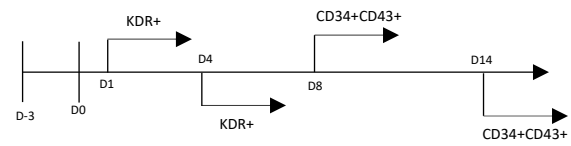

Figure S2

A Flow cytometry analysis at D4

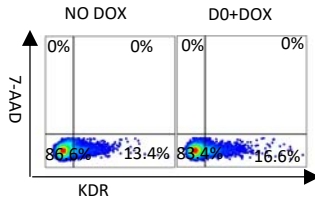

B Flow cytometry analysis at D8

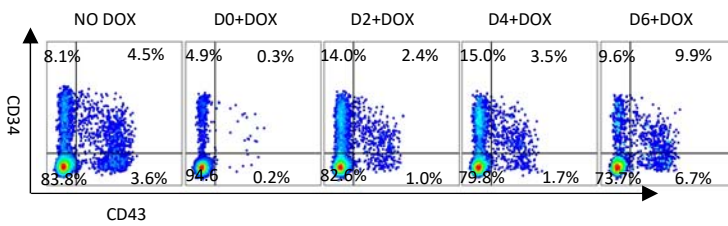

C Flow cytometry analysis at D14

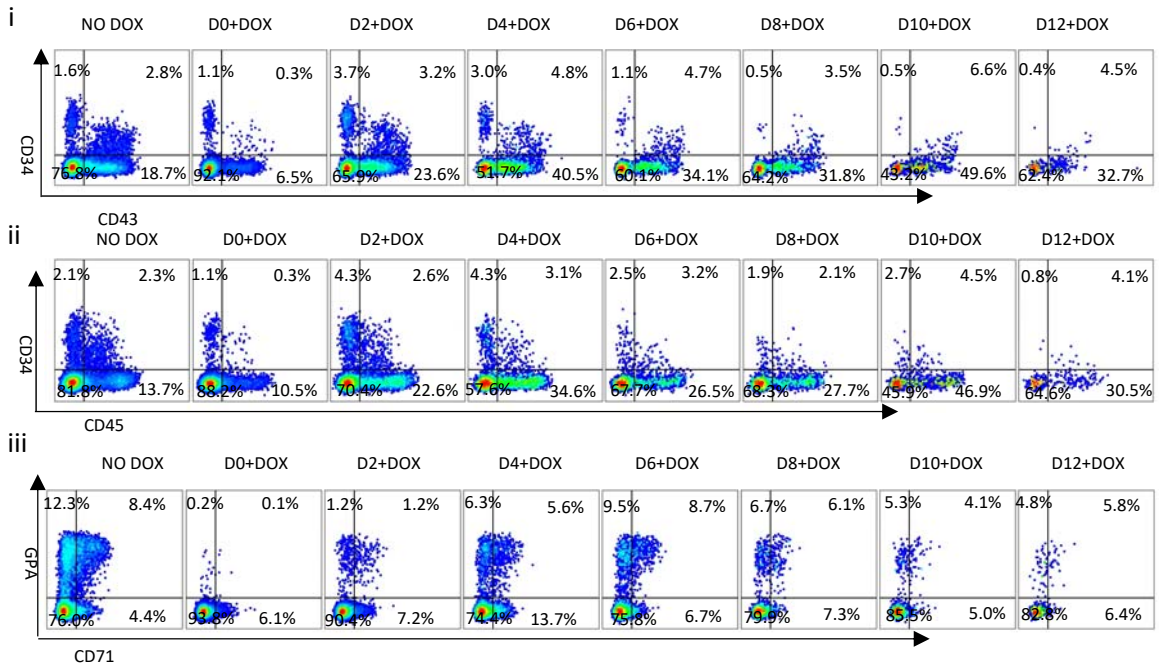

D Flow cytometry FMO at D14

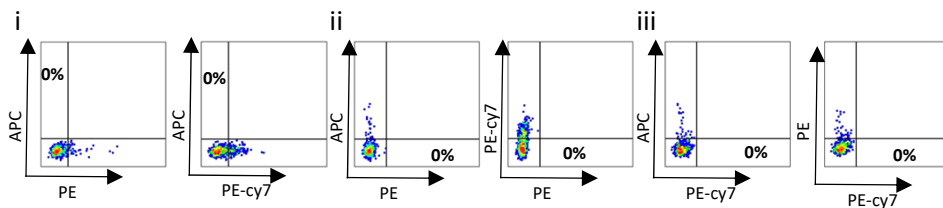



Figure S3

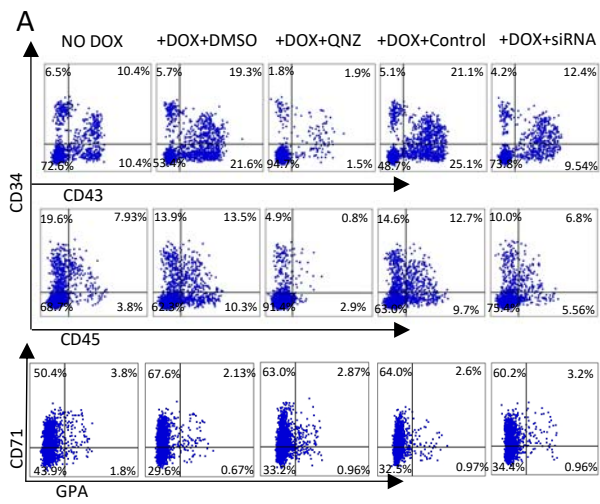

Figure S4

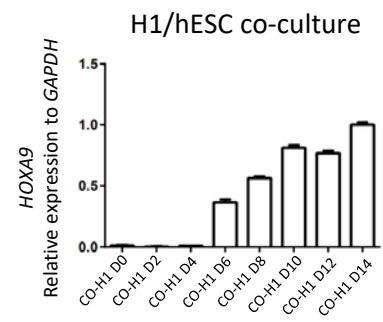

Supplement: 13619_2020_66_MOESM1_ESM.pdf [file 13619_2020_66_MOESM1_ESM.pdf]
